# Supplementary material
Source: PubMed Central journal article supplement (PMC2881815)

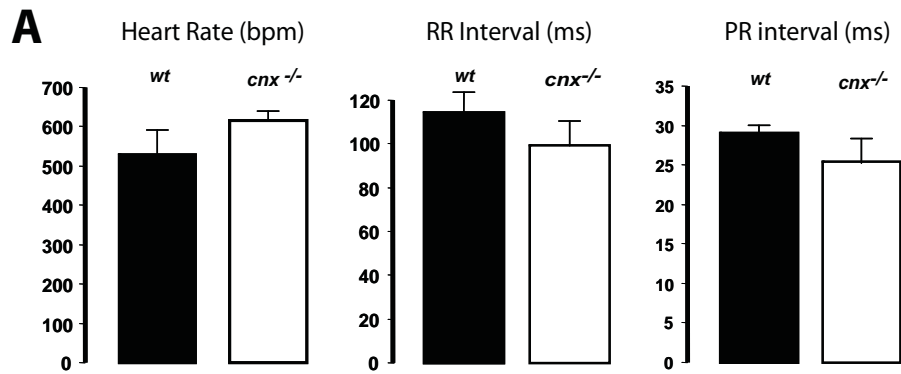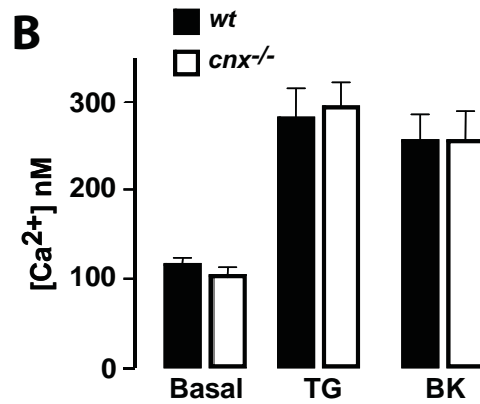

Supplementary Figure 1

Supplement: supp_M110.107201_jbc.M110.107201-1.pdf [file supp_M110.107201_jbc.M110.107201-1.pdf]
